# Supplementary material for: Survey on Limnic Gastropods: Relationships between Human Health and Conservation
Source: MDPI journal article supplement (doi:10.3390/pathogens11121533), 2022-12-13
Supplement: s1 [file s1]

Supplementary Materials:

Table S1: Distribution of limnic gastropods and associated trematodes and their coordinates

| Collection point data |                                   |                    | Limnic gastropods  |                         |                    |                     |                       |                   |                     |                           |                      |                                 | Larval trematodes           |             |                |                     |
|-----------------------|-----------------------------------|--------------------|--------------------|-------------------------|--------------------|---------------------|-----------------------|-------------------|---------------------|---------------------------|----------------------|---------------------------------|-----------------------------|-------------|----------------|---------------------|
|                       |                                   |                    | Ampullariidae      | Planorbidae             |                    |                     |                       |                   |                     |                           | Succineidae          | Lymnaeidae                      |                             |             |                | Physidae            |
| Points                | Geographic coordinates<br><br>UTM | Hydrographic units | <i>Pomacea</i> sp. | <i>Biomphalaria</i> sp. | <i>B. glabrata</i> | <i>B. straminea</i> | <i>B. tenagophila</i> | <i>B. cousini</i> | <i>B. kuhniiana</i> | <i>Drepanotrema cinex</i> | <i>Oncomelox</i> sp. | <i>Pseudosuccinea columella</i> | <i>Stemophysa marmorata</i> | Echinostome | Xiphiocercaria | Strigeid oocercaria |
| 1                     | -18,775347<br>-43,255115          | HU1                |                    | X                       | X                  |                     |                       |                   | X                   |                           |                      |                                 | X                           |             |                |                     |
| 2                     | -18,773126<br>-43,269246          | HU1                |                    | X                       | X                  |                     |                       |                   | X                   |                           |                      |                                 |                             |             |                |                     |
| 5                     | -18,77955<br>-43,285942           | HU1                | X                  | X                       | X                  | X                   |                       |                   | X                   | X                         |                      |                                 | X                           |             |                |                     |
| 6                     | -18,792883<br>-43,289729          | HU1                |                    | X                       | X                  |                     |                       |                   |                     |                           |                      |                                 | X                           |             |                |                     |
| 9                     | -18,760984<br>-43,342033          | HU3                |                    | X                       | X                  |                     |                       |                   |                     |                           |                      |                                 | X                           |             |                |                     |
| 10                    | -18,759874<br>-43,347945          | HU4                |                    | X                       | X                  |                     |                       |                   |                     |                           |                      | X                               |                             |             |                |                     |
| 11                    | -18,734675<br>-43,361932          | HU5                |                    | X                       |                    |                     |                       |                   | X                   | X                         |                      |                                 | X                           |             |                | X                   |
| 12                    | -18,737719<br>-43,363778          | HU5                |                    | X                       |                    |                     |                       |                   |                     |                           |                      |                                 | X                           |             |                |                     |
| 15                    | -18,730363<br>-43,365636          | HU4                |                    | X                       | X                  |                     |                       |                   |                     | X                         |                      |                                 | X                           |             |                |                     |
| 18                    | -18,763129<br>-43,413238          | HU7                |                    |                         |                    |                     |                       |                   |                     |                           | X                    | X                               | X                           |             |                |                     |
| 25                    | -18,78412<br>-43,377884           | HU7                |                    |                         |                    |                     |                       |                   |                     |                           |                      |                                 | X                           |             |                |                     |
| 32                    | -18,858279<br>-43,338465          | HU9                |                    | X                       |                    |                     |                       |                   |                     | X                         |                      |                                 | X                           |             | X              | X                   |
| 33                    | -18,856991<br>-43,339102          | HU9                |                    | X                       |                    |                     | X                     |                   |                     |                           |                      |                                 | X                           | X           |                |                     |
| 37                    | -18,697598<br>-43,332415          | HU12               |                    | X                       | X                  |                     |                       |                   |                     |                           |                      |                                 |                             |             |                |                     |
| 39                    | -18,707207<br>-43,336425          | HU12               |                    |                         |                    |                     |                       |                   |                     |                           |                      |                                 | X                           |             |                |                     |
| 40                    | -18,721655<br>-43,33313           | HU11               |                    | X                       |                    |                     |                       | X                 |                     |                           |                      |                                 |                             |             |                |                     |
| 41                    | -18,72545<br>-43,32192            | HU1                | X                  | X                       | X                  |                     |                       |                   | X                   |                           |                      |                                 | X                           |             |                |                     |

**Table S2:** Jaccard's analysis for hydrographic units

|      | HU1  | HU3  | HU4  | HU5  | HU7  | HU9 | HU12 | HU11 |
|------|------|------|------|------|------|-----|------|------|
| HU1  | 1    |      |      |      |      |     |      |      |
| HU3  | 0.42 | 1    |      |      |      |     |      |      |
| HU4  | 0.5  | 0.6  | 1    |      |      |     |      |      |
| HU5  | 0.57 | 0.4  | 0.5  | 1    |      |     |      |      |
| HU7  | 0.1  | 0.2  | 0.33 | 0.16 | 1    |     |      |      |
| HU9  | 0.37 | 0.4  | 0.5  | 0.6  | 0.16 | 1   |      |      |
| HU12 | 0.42 | 1    | 0.6  | 0.4  | 0.2  | 0.4 | 1    |      |
| HU11 | 0.12 | 0.25 | 0.16 | 0.2  | 0    | 0.2 | 0.25 | 1    |

**Table S3:** Jaccard's analysis for the limnic gastropods

|                         | <i>Biomphalaria</i> sp. | <i>B. glabrata</i> | <i>B. straminea</i> | <i>B. tenagophila</i> | <i>B. cousini</i> | <i>B. kuhniana</i> | <i>S. marmorata</i> | <i>D. cimex</i> | <i>Omalonyx</i> sp. | <i>P. columella</i> | <i>Pomacea</i> sp. |
|-------------------------|-------------------------|--------------------|---------------------|-----------------------|-------------------|--------------------|---------------------|-----------------|---------------------|---------------------|--------------------|
| <i>Biomphalaria</i> sp. | 1                       |                    |                     |                       |                   |                    |                     |                 |                     |                     |                    |
| <i>B. glabrata</i>      | 0.57                    | 1                  |                     |                       |                   |                    |                     |                 |                     |                     |                    |
| <i>B. straminea</i>     | 0.14                    | 0.25               | 1                   |                       |                   |                    |                     |                 |                     |                     |                    |
| <i>B. tenagophila</i>   | 0.14                    | 0                  | 0                   | 1                     |                   |                    |                     |                 |                     |                     |                    |
| <i>B. cousini</i>       | 0                       | 0                  | 0                   | 0                     | 1                 |                    |                     |                 |                     |                     |                    |
| <i>B. kuhniana</i>      | 0.28                    | 0.2                | 0.5                 | 0                     | 0                 | 1                  |                     |                 |                     |                     |                    |
| <i>S. marmorata</i>     | 0.75                    | 0.57               | 0.14                | 0.14                  | 0                 | 0.28               | 1                   |                 |                     |                     |                    |
| <i>D. cimex</i>         | 0.57                    | 0.3                | 0.25                | 0.25                  | 0                 | 0.5                | 0.57                | 1               |                     |                     |                    |
| <i>Omalonyx</i> sp.     | 0                       | 0                  | 0                   | 0                     | 0                 | 0                  | 0.14                | 0               | 1                   |                     |                    |
| <i>P. columella</i>     | 0.12                    | 0.2                | 0                   | 0                     | 0                 | 0                  | 0.28                | 0.2             | 0.5                 | 1                   |                    |
| <i>Pomacea</i> sp.      | 0.14                    | 0.25               | 1                   | 0                     | 0                 | 0.5                | 0.14                | 0.25            | 0                   | 0                   | 1                  |

**Table S4:** Logistic regression for *Biomphalaria glabrata*

| Variable Independent  | P                    | OR   |
|-----------------------|----------------------|------|
| <i>B. tenagophila</i> | Collinearity         |      |
| <i>B. straminea</i>   | Collinearity         |      |
| <i>Biomphalaria</i>   | Collinearity         |      |
| <i>B. cousini</i>     | Collinearity         |      |
| <i>B. kuhniana</i>    | Prob > chi2 = 0.0015 | 28.8 |
| <i>Drepanotrema</i>   | Prob > chi2 = 0.1488 |      |
| <i>Omalonyx</i>       | Collinearity         |      |
| <i>Pseudosuccinea</i> | Prob > chi2 = 0.3222 |      |
| <i>Stenophysa</i>     | Prob > chi2 = 0.0064 | 8.5  |
| <i>Pomacea</i>        | Collinearity         |      |
